# Supplementary material for: Measuring Coupling of Rhythmical Time Series Using Cross Sample Entropy and Cross Recurrence Quantification Analysis
Source: PubMed Central journal article supplement (PMC5671691; doi:10.1155/2017/7960467), 2017-10-22
Supplement: 7960467.f1.pdf [file 7960467.f1.pdf]

1 **Supplementary Data**

2 *Pairwise comparisons of  $xSE$  and  $cRQA$  measures for the simulated data (Tables S1-5).*

3 Note: A red box indicate manipulations that significantly affected the ratio of 1:1 to other ratios.

4 A blue box indicates manipulations that significantly affected the ratio of 1:2 to other ratios. A

5 yellow box indicates manipulations that significantly affected the ratio of 1:3 to other ratios. A

6 green box indicates manipulations that had an effect on the majority of ratio comparisons.

7 **Table S1.** Adjusted p-values for the pairwise comparisons of fluctuation ratio within each level of manipulation and signal fluctuation  
8 type for the simulated data for cRQA radius. Table excludes the periodic signal fluctuation type. Significantly different ( $p < 0.05$ )  
9 comparisons are shown in bold print. Note: M = manipulation and T = signal fluctuation type.

| Comparison | M: Frequency<br>T: Chaotic | M: Frequency<br>T: Random | M: Amplitude<br>T: Chaotic | M: Amplitude<br>T: Random | M: Freq/Amp<br>T: Chaotic | M: Freq/Amp<br>T: Random |
|------------|----------------------------|---------------------------|----------------------------|---------------------------|---------------------------|--------------------------|
| 1:1 to 1:2 | <b>&lt;.0001</b>           | 0.14                      | <b>&lt;.0001</b>           | <b>&lt;.0001</b>          | <b>&lt;.0001</b>          | <b>&lt;.0001</b>         |
| 1:1 to 1:3 | <b>&lt;.0001</b>           | 1.0                       | <b>&lt;.0001</b>           | <b>&lt;.0001</b>          | <b>&lt;.0001</b>          | <b>&lt;.0001</b>         |
| 1:1 to 1:4 | <b>&lt;.0001</b>           | <b>&lt;.0001</b>          | <b>&lt;.0001</b>           | <b>&lt;.0001</b>          | <b>&lt;.0001</b>          | <b>&lt;.0001</b>         |
| 1:1 to 2:3 | <b>&lt;.0001</b>           | 1.0                       | <b>&lt;.0001</b>           | <b>&lt;.0001</b>          | <b>&lt;.0001</b>          | <b>&lt;.0001</b>         |
| 1:1 to 2:5 | <b>&lt;.0001</b>           | 0.27                      | <b>&lt;.0001</b>           | <b>&lt;.0001</b>          | <b>&lt;.0001</b>          | <b>&lt;.0001</b>         |
| 1:1 to 2:7 | <b>&lt;.0001</b>           | 0.19                      | <b>&lt;.0001</b>           | <b>&lt;.0001</b>          | <b>&lt;.0001</b>          | <b>&lt;.0001</b>         |
| 1:2 to 1:3 | <b>&lt;.0001</b>           | 0.07                      | <b>&lt;.0001</b>           | <b>&lt;.0001</b>          | <b>&lt;.0001</b>          | 1.0                      |
| 1:2 to 1:4 | 0.11                       | <b>&lt;.0001</b>          | <b>0.04</b>                | 1.0                       | 0.86                      | 1.0                      |
| 1:2 to 2:3 | 0.63                       | 0.11                      | <b>0.01</b>                | <b>0.001</b>              | <b>&lt;.0001</b>          | <b>0.004</b>             |
| 1:2 to 2:5 | <b>0.03</b>                | 1.0                       | 1.0                        | 1.0                       | <b>&lt;.0001</b>          | 1.0                      |
| 1:2 to 2:7 | <b>0.04</b>                | <b>&lt;.0001</b>          | 1.0                        | 1.0                       | <b>0.04</b>               | 0.38                     |
| 1:3 to 1:4 | 0.06                       | <b>&lt;.0001</b>          | <b>&lt;.0001</b>           | <b>&lt;.0001</b>          | <b>0.0004</b>             | 0.90                     |
| 1:3 to 2:3 | <b>0.003</b>               | 1.0                       | <b>&lt;.0001</b>           | <b>&lt;.0001</b>          | 0.07                      | <b>0.01</b>              |
| 1:3 to 2:5 | 0.20                       | 0.14                      | <b>&lt;.0001</b>           | <b>&lt;.0001</b>          | 1.0                       | 1.0                      |
| 1:3 to 2:7 | 0.14                       | 0.35                      | <b>&lt;.0001</b>           | <b>&lt;.0001</b>          | 0.44                      | 0.18                     |
| 1:4 to 2:3 | 0.94                       | <b>&lt;.0001</b>          | <b>&lt;.0001</b>           | <b>0.0005</b>             | <b>&lt;.0001</b>          | <b>0.0003</b>            |
| 1:4 to 2:5 | 1.0                        | <b>&lt;.0001</b>          | 0.10                       | 1.0                       | <b>0.0008</b>             | 0.75                     |
| 1:4 to 2:7 | 1.0                        | <b>0.02</b>               | <b>0.01</b>                | 1.0                       | 0.12                      | 0.84                     |
| 2:3 to 2:5 | 0.68                       | 0.21                      | <b>0.003</b>               | <b>0.0001</b>             | <b>0.04</b>               | <b>0.03</b>              |
| 2:3 to 2:7 | 0.78                       | 0.24                      | <b>0.04</b>                | <b>0.0008</b>             | <b>0.0002</b>             | <b>&lt;.0001</b>         |
| 2:5 to 2:7 | 1.0                        | <b>0.0003</b>             | 0.97                       | 1.0                       | 0.58                      | 0.10                     |

11 **Table S2.** Adjusted p-values for the pairwise comparisons of fluctuation ratio within each level of manipulation and signal fluctuation  
 12 type for the simulated data for cRQA %DET. Table excludes the periodic signal fluctuation type. Significantly different (p<0.05)  
 13 comparisons are shown in bold print. Note: M = manipulation and T = signal fluctuation type.

| Comparison | M: Frequency<br>T: Chaotic | M: Frequency<br>T: Random | M: Amplitude<br>T: Chaotic | M: Amplitude<br>T: Random | M: Freq/Amp<br>T: Chaotic | M: Freq/Amp<br>T: Random |
|------------|----------------------------|---------------------------|----------------------------|---------------------------|---------------------------|--------------------------|
| 1:1 to 1:2 | <b>&lt;.0001</b>           | 0.14                      | <b>&lt;.0001</b>           | <b>&lt;.0001</b>          | <b>&lt;.0001</b>          | <b>&lt;.0001</b>         |
| 1:1 to 1:3 | <b>&lt;.0001</b>           | 1.0                       | <b>&lt;.0001</b>           | <b>&lt;.0001</b>          | <b>&lt;.0001</b>          | <b>&lt;.0001</b>         |
| 1:1 to 1:4 | <b>&lt;.0001</b>           | <b>&lt;.0001</b>          | <b>&lt;.0001</b>           | <b>&lt;.0001</b>          | <b>&lt;.0001</b>          | <b>&lt;.0001</b>         |
| 1:1 to 2:3 | <b>&lt;.0001</b>           | 1.0                       | <b>&lt;.0001</b>           | <b>&lt;.0001</b>          | <b>&lt;.0001</b>          | <b>&lt;.0001</b>         |
| 1:1 to 2:5 | <b>&lt;.0001</b>           | 0.27                      | <b>&lt;.0001</b>           | <b>&lt;.0001</b>          | <b>&lt;.0001</b>          | <b>&lt;.0001</b>         |
| 1:1 to 2:7 | <b>&lt;.0001</b>           | 0.19                      | <b>&lt;.0001</b>           | <b>&lt;.0001</b>          | <b>&lt;.0001</b>          | <b>&lt;.0001</b>         |
| 1:2 to 1:3 | <b>&lt;.0001</b>           | 0.07                      | <b>&lt;.0001</b>           | <b>&lt;.0001</b>          | <b>&lt;.0001</b>          | 1.0                      |
| 1:2 to 1:4 | 0.11                       | <b>&lt;.0001</b>          | <b>0.04</b>                | 1.0                       | 0.86                      | 1.0                      |
| 1:2 to 2:3 | 0.63                       | 0.11                      | <b>0.01</b>                | <b>0.001</b>              | <b>&lt;.0001</b>          | <b>0.004</b>             |
| 1:2 to 2:5 | <b>0.03</b>                | 1.0                       | 1.0                        | 1.0                       | <b>&lt;.0001</b>          | 1.0                      |
| 1:2 to 2:7 | <b>0.04</b>                | <b>&lt;.0001</b>          | 1.0                        | 1.0                       | <b>0.004</b>              | 0.38                     |
| 1:3 to 1:4 | 0.06                       | <b>&lt;.0001</b>          | <b>&lt;.0001</b>           | <b>&lt;.0001</b>          | <b>0.0004</b>             | 0.90                     |
| 1:3 to 2:3 | <b>0.003</b>               | 1.0                       | <b>&lt;.0001</b>           | <b>&lt;.0001</b>          | 0.10                      | 0.01                     |
| 1:3 to 2:5 | 0.20                       | 0.14                      | <b>&lt;.0001</b>           | <b>&lt;.0001</b>          | 1.0                       | 1.0                      |
| 1:3 to 2:7 | 0.14                       | 0.35                      | <b>&lt;.0001</b>           | <b>&lt;.0001</b>          | 0.44                      | 0.18                     |
| 1:4 to 2:3 | 0.94                       | <b>&lt;.0001</b>          | <b>&lt;.0001</b>           | <b>0.0005</b>             | <b>&lt;.0001</b>          | <b>0.0003</b>            |
| 1:4 to 2:5 | 1.0                        | <b>&lt;.0001</b>          | 0.10                       | 1.0                       | <b>0.0008</b>             | 0.75                     |
| 1:4 to 2:7 | 1.0                        | <b>0.02</b>               | <b>0.009</b>               | 1.0                       | 0.12                      | 0.84                     |
| 2:3 to 2:5 | 0.68                       | 0.21                      | <b>0.003</b>               | <b>0.0001</b>             | <b>0.04</b>               | <b>0.03</b>              |
| 2:3 to 2:7 | 0.78                       | 0.24                      | <b>0.04</b>                | <b>0.0008</b>             | <b>0.0002</b>             | <b>&lt;.0001</b>         |
| 2:5 to 2:7 | 1.0                        | <b>0.0003</b>             | 1.0                        | 1.0                       | 0.58                      | 0.10                     |

15 **Table S3.** Adjusted p-values for the pairwise comparisons of fluctuation ratio within each level of manipulation and signal fluctuation  
 16 type for the simulated data for cRQA Max Line. Table excludes the periodic signal fluctuation type. Significantly different (p<0.05)  
 17 comparisons are shown in bold print. Note: M = manipulation and T = signal fluctuation type.

| Comparison | M: Frequency<br>T: Chaotic | M: Frequency<br>T: Random | M: Amplitude<br>T: Chaotic | M: Amplitude<br>T: Random | M: Freq/Amp<br>T: Chaotic | M: Freq/Amp<br>T: Random |
|------------|----------------------------|---------------------------|----------------------------|---------------------------|---------------------------|--------------------------|
| 1:1 to 1:2 | <b>&lt;.0001</b>           | <b>&lt;.0001</b>          | <b>&lt;.0001</b>           | <b>&lt;.0001</b>          | <b>&lt;.0001</b>          | <b>&lt;.0001</b>         |
| 1:1 to 1:3 | <b>&lt;.0001</b>           | <b>&lt;.0001</b>          | <b>&lt;.0001</b>           | <b>&lt;.0001</b>          | <b>&lt;.0001</b>          | <b>&lt;.0001</b>         |
| 1:1 to 1:4 | <b>&lt;.0001</b>           | <b>&lt;.0001</b>          | <b>&lt;.0001</b>           | <b>&lt;.0001</b>          | <b>&lt;.0001</b>          | <b>&lt;.0001</b>         |
| 1:1 to 2:3 | <b>&lt;.0001</b>           | <b>&lt;.0001</b>          | <b>&lt;.0001</b>           | <b>&lt;.0001</b>          | <b>&lt;.0001</b>          | <b>&lt;.0001</b>         |
| 1:1 to 2:5 | <b>&lt;.0001</b>           | <b>&lt;.0001</b>          | <b>&lt;.0001</b>           | <b>&lt;.0001</b>          | <b>&lt;.0001</b>          | <b>&lt;.0001</b>         |
| 1:1 to 2:7 | <b>&lt;.0001</b>           | <b>&lt;.0001</b>          | <b>&lt;.0001</b>           | <b>&lt;.0001</b>          | <b>&lt;.0001</b>          | <b>&lt;.0001</b>         |
| 1:2 to 1:3 | 0.81                       | 1.0                       | 0.28                       | 0.09                      | <b>&lt;.0001</b>          | <b>&lt;.0001</b>         |
| 1:2 to 1:4 | 0.94                       | 1.0                       | 1.0                        | 1.0                       | <b>0.01</b>               | <b>&lt;.0001</b>         |
| 1:2 to 2:3 | <b>&lt;.0001</b>           | <b>&lt;.0001</b>          | 0.55                       | 0.89                      | <b>0.0002</b>             | <b>&lt;.0001</b>         |
| 1:2 to 2:5 | 0.84                       | 1.0                       | 1.0                        | 1.0                       | <b>0.004</b>              | <b>&lt;.0001</b>         |
| 1:2 to 2:7 | 0.91                       | 1.0                       | 0.90                       | 0.84                      | <b>0.0003</b>             | <b>&lt;.0001</b>         |
| 1:3 to 1:4 | 1.0                        | 1.0                       | 0.76                       | 0.23                      | 0.66                      | 1.0                      |
| 1:3 to 2:3 | <b>&lt;.0001</b>           | <b>&lt;.0001</b>          | <b>0.03</b>                | <b>0.003</b>              | <b>&lt;.0001</b>          | <b>&lt;.0001</b>         |
| 1:3 to 2:5 | 1.0                        | 1.0                       | 0.64                       | 0.16                      | 0.83                      | 0.49                     |
| 1:3 to 2:7 | 1.0                        | 1.0                       | 0.93                       | 0.74                      | 1.0                       | 1.0                      |
| 1:4 to 2:3 | <b>&lt;.0001</b>           | <b>&lt;.0001</b>          | 0.15                       | 0.64                      | <b>&lt;.0001</b>          | <b>&lt;.0001</b>         |
| 1:4 to 2:5 | 1.0                        | 1.0                       | 1.0                        | 1.0                       | 1.0                       | 0.33                     |
| 1:4 to 2:7 | 1.0                        | 1.0                       | 1.0                        | 0.98                      | 0.92                      | 1.0                      |
| 2:3 to 2:5 | <b>&lt;.0001</b>           | <b>&lt;.0001</b>          | 0.22                       | 0.76                      | <b>&lt;.0001</b>          | <b>&lt;.0001</b>         |
| 2:3 to 2:7 | <b>&lt;.0001</b>           | <b>&lt;.0001</b>          | 0.06                       | 0.17                      | <b>&lt;.0001</b>          | <b>&lt;.0001</b>         |
| 2:5 to 2:7 | 1.0                        | 1.0                       | 1.0                        | 0.94                      | 0.98                      | 0.50                     |

19 **Table S4.** Adjusted p-values for the pairwise comparisons of fluctuation ratio within each level of manipulation and signal fluctuation  
 20 type for the simulated data for cRQA Mean Line. Table excludes the periodic signal fluctuation type. Significantly different ( $p < 0.05$ )  
 21 comparisons are shown in bold print. Note: M = manipulation and T = signal fluctuation type.

| Comparison | M: Frequency<br>T: Chaotic | M: Frequency<br>T: Random | M: Amplitude<br>T: Chaotic | M: Amplitude<br>T: Random | M: Freq/Amp<br>T: Chaotic | M: Freq/Amp<br>T: Random |
|------------|----------------------------|---------------------------|----------------------------|---------------------------|---------------------------|--------------------------|
| 1:1 to 1:2 | <b>&lt;.0001</b>           | <b>&lt;.0001</b>          | <b>&lt;.0001</b>           | <b>&lt;.0001</b>          | <b>&lt;.0001</b>          | <b>&lt;.0001</b>         |
| 1:1 to 1:3 | <b>&lt;.0001</b>           | <b>&lt;.0001</b>          | <b>&lt;.0001</b>           | <b>&lt;.0001</b>          | <b>&lt;.0001</b>          | <b>&lt;.0001</b>         |
| 1:1 to 1:4 | <b>&lt;.0001</b>           | <b>&lt;.0001</b>          | <b>&lt;.0001</b>           | <b>&lt;.0001</b>          | <b>&lt;.0001</b>          | <b>&lt;.0001</b>         |
| 1:1 to 2:3 | <b>&lt;.0001</b>           | <b>&lt;.0001</b>          | <b>&lt;.0001</b>           | <b>&lt;.0001</b>          | <b>&lt;.0001</b>          | <b>1.0000</b>            |
| 1:1 to 2:5 | <b>&lt;.0001</b>           | <b>&lt;.0001</b>          | <b>&lt;.0001</b>           | <b>&lt;.0001</b>          | <b>&lt;.0001</b>          | <b>&lt;.0001</b>         |
| 1:1 to 2:7 | <b>&lt;.0001</b>           | <b>&lt;.0001</b>          | <b>&lt;.0001</b>           | <b>&lt;.0001</b>          | <b>&lt;.0001</b>          | <b>&lt;.0001</b>         |
| 1:2 to 1:3 | <b>0.002</b>               | 0.41                      | <b>&lt;.0001</b>           | <b>&lt;.0001</b>          | <b>&lt;.0001</b>          | 0.32                     |
| 1:2 to 1:4 | 0.97                       | 0.67                      | <b>0.01</b>                | <b>0.007</b>              | 0.25                      | 1.0                      |
| 1:2 to 2:3 | <b>&lt;.0001</b>           | <b>0.0002</b>             | <b>0.002</b>               | <b>&lt;.0001</b>          | <b>&lt;.0001</b>          | <b>&lt;.0001</b>         |
| 1:2 to 2:5 | 0.07                       | 0.97                      | <b>0.001</b>               | <b>0.003</b>              | <b>&lt;.0001</b>          | 0.05                     |
| 1:2 to 2:7 | 0.98                       | 0.41                      | <b>0.001</b>               | <b>&lt;.0001</b>          | <b>&lt;.0001</b>          | 0.99                     |
| 1:3 to 1:4 | <b>0.04</b>                | 1.0                       | <b>0.005</b>               | <b>&lt;.0001</b>          | <b>&lt;.0001</b>          | 0.45                     |
| 1:3 to 2:3 | <b>&lt;.0001</b>           | 0.09                      | <b>&lt;.0001</b>           | <b>&lt;.0001</b>          | <b>&lt;.0001</b>          | <b>&lt;.0001</b>         |
| 1:3 to 2:5 | 0.89                       | 0.92                      | 0.05                       | <b>&lt;.0001</b>          | 0.87                      | 0.97                     |
| 1:3 to 2:7 | <b>0.03</b>                | 1.0                       | 0.05                       | <b>0.0005</b>             | 0.21                      | 0.75                     |
| 1:4 to 2:3 | <b>&lt;.0001</b>           | <b>0.03</b>               | <b>&lt;.0001</b>           | <b>&lt;.0001</b>          | <b>&lt;.0001</b>          | <b>&lt;.0001</b>         |
| 1:4 to 2:5 | 0.42                       | 0.99                      | 0.99                       | 1.0                       | <b>0.005</b>              | 0.08                     |
| 1:4 to 2:7 | 1.0                        | 1.0                       | 0.99                       | 0.84                      | 0.11                      | 1.0                      |
| 2:3 to 2:5 | <b>&lt;.0001</b>           | <b>0.004</b>              | <b>&lt;.0001</b>           | <b>&lt;.0001</b>          | <b>&lt;.0001</b>          | <b>&lt;.0001</b>         |
| 2:3 to 2:7 | <b>&lt;.0001</b>           | 0.09                      | <b>&lt;.0001</b>           | <b>&lt;.0001</b>          | <b>&lt;.0001</b>          | <b>&lt;.0001</b>         |
| 2:5 to 2:7 | 0.39                       | 0.91                      | 1.0                        | 0.95                      | 0.90                      | 0.22                     |

23 **Table S5.** Adjusted p-values for the pairwise comparisons of fluctuation ratio within each level of manipulation and signal fluctuation  
 24 type for the simulated data for cRQA Entropy. Table excludes the periodic signal fluctuation type. Significantly different ( $p < 0.05$ )  
 25 comparisons are shown in bold print. Note: M = manipulation and T = signal fluctuation type.

| Comparison | M: Frequency<br>T: Chaotic | M: Frequency<br>T: Random | M: Amplitude<br>T: Chaotic | M: Amplitude<br>T: Random | M: Freq/Amp<br>T: Chaotic | M: Freq/Amp<br>T: Random |
|------------|----------------------------|---------------------------|----------------------------|---------------------------|---------------------------|--------------------------|
| 1:1 to 1:2 | <b>&lt;.0001</b>           | <b>&lt;.0001</b>          | <b>&lt;.0001</b>           | <b>&lt;.0001</b>          | <b>&lt;.0001</b>          | <b>&lt;.0001</b>         |
| 1:1 to 1:3 | <b>&lt;.0001</b>           | <b>&lt;.0001</b>          | <b>&lt;.0001</b>           | <b>&lt;.0001</b>          | <b>&lt;.0001</b>          | <b>&lt;.0001</b>         |
| 1:1 to 1:4 | <b>&lt;.0001</b>           | <b>&lt;.0001</b>          | <b>&lt;.0001</b>           | <b>&lt;.0001</b>          | <b>&lt;.0001</b>          | <b>&lt;.0001</b>         |
| 1:1 to 2:3 | <b>&lt;.0001</b>           | <b>&lt;.0001</b>          | <b>&lt;.0001</b>           | <b>&lt;.0001</b>          | <b>&lt;.0001</b>          | 0.51                     |
| 1:1 to 2:5 | <b>&lt;.0001</b>           | <b>&lt;.0001</b>          | <b>&lt;.0001</b>           | <b>&lt;.0001</b>          | <b>&lt;.0001</b>          | <b>&lt;.0001</b>         |
| 1:1 to 2:7 | <b>&lt;.0001</b>           | <b>&lt;.0001</b>          | <b>&lt;.0001</b>           | <b>&lt;.0001</b>          | <b>&lt;.0001</b>          | <b>&lt;.0001</b>         |
| 1:2 to 1:3 | <b>&lt;.0001</b>           | 0.62                      | <b>&lt;.0001</b>           | <b>&lt;.0001</b>          | <b>&lt;.0001</b>          | <b>&lt;.0001</b>         |
| 1:2 to 1:4 | 0.29                       | 0.91                      | <b>0.0014</b>              | <b>0.006</b>              | <b>0.005</b>              | 0.06                     |
| 1:2 to 2:3 | <b>&lt;.0001</b>           | <b>&lt;.0001</b>          | 0.29                       | <b>&lt;.0001</b>          | <b>&lt;.0001</b>          | <b>&lt;.0001</b>         |
| 1:2 to 2:5 | <b>&lt;.0001</b>           | 0.94                      | <b>&lt;.0001</b>           | <b>0.005</b>              | <b>&lt;.0001</b>          | <b>&lt;.0001</b>         |
| 1:2 to 2:7 | <b>0.004</b>               | 0.88                      | <b>&lt;.0001</b>           | <b>&lt;.0001</b>          | <b>&lt;.0001</b>          | 0.06                     |
| 1:3 to 1:4 | <b>&lt;.0001</b>           | 1.0                       | <b>&lt;.0001</b>           | <b>&lt;.0001</b>          | <b>&lt;.0001</b>          | 0.26                     |
| 1:3 to 2:3 | <b>&lt;.0001</b>           | <b>&lt;.0001</b>          | <b>&lt;.0001</b>           | <b>&lt;.0001</b>          | <b>&lt;.0001</b>          | <b>&lt;.0001</b>         |
| 1:3 to 2:5 | 0.16                       | 1.0                       | <b>&lt;.0001</b>           | <b>&lt;.0001</b>          | <b>0.01</b>               | 0.94                     |
| 1:3 to 2:7 | <b>&lt;.0001</b>           | 1.0                       | <b>&lt;.0001</b>           | <b>&lt;.0001</b>          | <b>&lt;.0001</b>          | 0.26                     |
| 1:4 to 2:3 | <b>&lt;.0001</b>           | <b>&lt;.0001</b>          | <b>&lt;.0001</b>           | <b>&lt;.0001</b>          | <b>&lt;.0001</b>          | <b>&lt;.0001</b>         |
| 1:4 to 2:5 | <b>&lt;.0001</b>           | 1.0                       | 0.95                       | 1.0                       | <b>&lt;.0001</b>          | <b>0.02</b>              |
| 1:4 to 2:7 | 0.63                       | 1.0                       | 0.98                       | 0.55                      | <b>&lt;.0001</b>          | 1.00                     |
| 2:3 to 2:5 | <b>&lt;.0001</b>           | <b>&lt;.0001</b>          | <b>&lt;.0001</b>           | <b>&lt;.0001</b>          | <b>&lt;.0001</b>          | <b>&lt;.0001</b>         |
| 2:3 to 2:7 | <b>&lt;.0001</b>           | <b>&lt;.0001</b>          | <b>&lt;.0001</b>           | <b>&lt;.0001</b>          | <b>&lt;.0001</b>          | <b>&lt;.0001</b>         |
| 2:5 to 2:7 | <b>&lt;.0001</b>           | 1.0                       | 1.0                        | 0.58                      | 0.29                      | <b>0.02</b>              |

## 27 Matlab script used to calculate Cross Sample Entropy (xSE)

```
28 function xSE = xSamp_Ent(x,y,m,R,norm)
29 % xSE = xSamp_Ent(x,y,m,R,norm)
30
31 % Function to calculate cross sample entropy for 2 data series using the
32 % method described by Richman and Moorman (2000). J McCamley - Sept, 2015;
33
34 % Inputs
35 % x - first data series
36 % y - second data series
37 % m - vector length for matching (usually 2 or 3)
38 % R - R tolerance to find matches (as a proportion of the average of the
39 %     SDs of the data sets, usually between 0.15 and 0.25)
40 % norm - normalization to perform
41 %     1 = max rescale/unit interval (data ranges in value from 0 - 1)
42 %     2 = mean/Zscore (used when data is more variable or has outliers)
43 %     normalized data has SD = 1. This is best for cross sample entropy.
44 %     Set to any value other than 1 or 2 to not normalize/rescale the
45 %     data
46
47 % Check both sets of data are the same length
48 x1 = length(x);
49 y1 = length(y);
50 if x1 ~= y1
51     disp('The data series need to be the same length!')
52 end
53 N = length(x);
54 % normalize the data ensure data fits in the same "space"
```

```

55  if norm == 1 %normalize data to have a range 0 - 1
56      xn = (x - min(x))/(max(x) - min(x));
57      yn = (y - min(y))/(max(y) - min(y));
58      r = R * ((std(xn)+std(yn))/2);
59  elseif norm == 2 % normalize data to have a SD = 1, and mean = 0
60      xn = (x - mean(x))/std(x);
61      yn = (y - mean(y))/std(y);
62      r = R;
63  else disp('These data will not be normalized')
64  end
65
66  fprintf(' 00.00%%');
67  for i = 1:N-m
68      for j = 1:N-m
69          for k = 1:m+1;
70              dij(k) = abs(xn(i+k-1)-yn(j+k-1));
71          end
72          di(j) = max(dij(1:m));
73          di1(j) = max(dij(1:m+1));
74      end
75      d = find(di<=r); % find the vectors of length 'm' that are less than "r"
76      distant from one another
77      d1 = find(di1<=r); % find the vectors of length 'm+1' that are less than
78      "r" distant from one another
79      nm = length(d);
80      Bm(i) = nm/(N-m);
81      nm1 = length(d1);
82      Am(i) = nm1/(N-m);

```



```
83     if mod(i,1000) == 0
84         fprintf(repmat('\b',1,7));
85         fprintf('%3.0d', floor(i/(N-m)*100));
86         fprintf('%.%1.0f', floor(mod((i/(N-m))*100,1)*10));
87         fprintf('%.%1.0f', floor(mod((i/(N-m))*1000,1)*10));
88         fprintf('%%');
89     end
90 end
91 fprintf(repmat('\b',1,7));
92 fprintf('100.00%%');
93 fprintf('\r');
94
95 Bmr = sum(Bm)/(N-m);
96 Amr = sum(Am)/(N-m);
97
98 xSE = -log(Amr/Bmr);
99 end
100
101
102
103
104
105
106
107
108 Matlab script used to calculate cross recurrence quantification analysis (cRQA)
```

```
109 function [RP, RESULTS]=RQA (DATA,TYPE,EMB,DEL,ZSCORE,NORM,SETPARA,SETVALUE)
110 % [RP, RESULTS]=RQA (DATA,TYPE,EMB,DEL,ZSCORE,NORM,SETPARA,SETVALUE)
111 %
112 % Computes a recurrence plot for either recurrence quantification analysis
113 % (RQA), cross recurrence quantification analysis (cRQA), joint recurrence
114 % quantification analysis (jRQA), or multidimensional recurrence
115 % quantification analysis (mdRQA). Either radius or target recurrence can
116 % be set.
117 %
118 %
119 % Inputs:
120 %
121 % DATA is a double-variable with each dimension of the to-be-analyzed
122 % signal as a row of numbers in a separate column. If too many columns are
123 % present for the TYPE of analysis selected, the other columns will be
124 % ignored (i.e. for 'cRQA' only the first two columns will be used).
125 %
126 % TYPE is a string indicating which type of RQA to run (i.e. 'RQA',
127 % 'cRQA', 'jRQA', 'mdRQA').
128 % The default value is TYPE = 'RQA'.
129 %
130 % EMB is the number of embedding dimensions (i.e., EMB = 1 would be no
131 % embedding via time-delayed surrogates, just using the provided number of
132 % columns as dimensions.
133 % The default value is EMB = 1.
134 %
135 % DEL is the delay parameter used for time-delayed embedding (if EMB > 1).
136 % The default value is DEL = 1.
137 %
```

```
138 % ZSCORE indicates, whether the data (i.e., the different columns of DATA,
139 % being the different signals or dimensions of a signal) should be
140 % z-scored before performing MdrQA:
141 %   0 - no z-scoring of DATA
142 %   1 - z-score columns of DATA
143 % The default value is ZSCORE = 0.
144 %
145 % NORM is the type of norm by with the phase-space is normalized. The
146 % following norms are available:
147 %   'euc' - Euclidean distance norm
148 %   'max' - Maximum distance norm
149 %   'min' - Minimum distance norm
150 %   'non' - no normalization of phase-space
151 % The default value is NORM = 'non'.
152 %
153 % SETPARA is the parameter which you would like to set a target value for
154 % the recurrence plot (i.e. 'radius' or 'recurrence').
155 % The default value is SETPARA = 'radius'.
156 %
157 % SETVALUE sets the value of the selected parameter. If SETVALUE = 1, then
158 % the radius will be set to 1 if SETPARA = 'radius' or the radius will be
159 % adjusted until the recurrence is equal to 1 if SETPARA = 'recurrence'.
160 % The default value if SETPARA = 'radius' is 1.
161 % The default value if SETPARA = 'recurrence' is 2.5.
162 %
163 %
164 % Outputs:
165 %
166 % RP is a matrix holding the resulting recurrence plot.
```

```
167 %
168 % RESULTS is a structure holding the following recurrence variables:
169 % 1. DIM - dimension of the input data (used for mdRQA)
170 % 2. EMB - embedding dimension used in the calculation of the
171 % distance matrix
172 % 3. DEL - time lag used in the calculation of the distance matrix
173 % 4. RADIUS - radius used for the recurrence plot
174 % 5. NORM - type of normilization used for the distance matrix
175 % 6. ZSCORE - whether or not zscore was used
176 % 7. Size - size of the recurrence plot
177 % 8. %REC - percentage of recurrent points
178 % 9. %DET - percentage of diagonally adjacent recurrent points
179 % 10. MeanL - average length of adjacent recurrent points
180 % 11. MaxL - maximum length of diagonally adjacent recurrent points
181 % 12. EntrL - Shannon entropy of distribution of diagonal lines
182 % 13. %LAM - percentage of vertically adjacent recurrent points
183 % 14. MeanV - average length of diagonally adjacent recurrent points
184 % 15. MaxV - maximum length of vertically adjacent recurrent points
185 % 16. EntrV - Shannon entropy of distribution of vertical lines
186 % 17. EntrW - Weighted entropy of distribution of vertical weighted sums
187 %
188 %
189 % Reference:
190 %
191 % Wallot, S., Roepstorff, A., & Monster, D. (2016). Multidimensional
192 % Recurrence Quantification Analysis (MdRQA) for the analysis of
193 % multidimensional time-series: A software implementation in MATLAB and its
194 % application to group-level data in joint action. Frontiers in Psychology,
195 % 7, 1835. http://dx.doi.org/10.3389/fpsyg.2016.01835
```

```
196 %
197 % Eroglu, D., Peron, T. K. D., Marwan, N., Rodrigues, F. A., Costa, L. D.
198 % F., Sebek, M., ... & Kurths, J. (2014). Entropy of weighted recurrence
199 % plots. Physical Review E, 90(4), 042919.
200
201
202 % Version:
203 %
204 % v1.0, 28. July 2016
205 % by Sebastian Wallot, Max Planck Institute for Empirical Aesthetics,
206 Frankfurt, Germany
207 % & Dan Mønster, Aarhus University, Aarhus, Denmark
208 %
209 % v1.1, 06. July 2017
210 % by Will Denton (21denton@gmail.com), Troy Rand (troyrand@gmail.com), and
211 % Casey Wiens (cwiens32@gmail.com), Biomechanics Research Building,
212 % University of Nebraska at Omaha. Changes include cleaning up some
213 % errors, making the default input arguments function correctly,
214 % incorporating other types of RQA (e.g. RQA, CRQA, JRQA), allowing %REC
215 % to be set instead of radius, incorporating weighted recurrence plots,
216 % and adding weighted entropy.
217
218 %% Set default parameters if no input exists
219 % If SETPARAM is not specified, set to 'radius'
220 if nargin < 7 || isempty(SETPARAM)
221     SETPARAM = 'radius';
222 end
223
```

```
224 % If SETVALUE is not specified, set to 1 if radius is set or 2.5 if perRec is
225 set
226 if nargin < 8 || isempty(SETVALUE)
227     switch lower(SETPARA)
228         case {'radius','rad', 1}
229             radius = 1;
230             runSetRad = 0;
231         case {'perrec','recurrence', 2}
232             radiusStart = 0.01;
233             radiusEnd = 0.5;
234             runSetRad = 1;
235             SETVALUE = 2.5;
236     end
237 else
238     switch lower(SETPARA)
239         case {'radius','rad', 1}
240             radius = SETVALUE;
241             runSetRad = 0;
242         case {'perrec','recurrence', 2}
243             radiusStart = 0.01;
244             radiusEnd = 0.5;
245             runSetRad = 1;
246     end
247 end
248
249 % If NORM is not specified, set to 'non'
250 if nargin < 6 || isempty(NORM)
251     NORM = 'non';
```

```
252 end
253
254 % If ZSCORE is not specified, set to 0
255 if nargin < 5 || isempty(ZSCORE)
256     ZSCORE = 0;
257 end
258
259 % If DEL is not specified, set to 1
260 if nargin < 4 || isempty(DEL)
261     DEL = 1;
262 end
263
264 % If EMB is not specified, set to 1
265 if nargin < 3 || isempty(EMB)
266     EMB = 1;
267 end
268
269 % If EMB is not specified, set to 1
270 if nargin < 2 || isempty(TYPE)
271     TYPE = 'RQA';
272 end
273
274 % If z score is selected then z score the data
275 if ZSCORE
276     DATA = zscore(DATA);
277 end
278
```

```

279 %% Begin code
280 % Set DIM and select proper column(s) of data if too many exist
281 c = size(DATA,2);
282 switch upper(TYPE)
283     case 'RQA'
284         DIM = 1;
285         if c > 1
286             DATA = DATA(:,1);
287             warning('More than one column of data. Only using first
288 column.');
```

```

289         end
290     case {'CRQA','CROSS'}
291         DIM = 2;
292         if c > 2
293             DATA = DATA(:,1:2);
294             warning('More than two columns of data. Only using first two
295 columns.');
```

```

296         end
297     case {'JRQA','JOINT'}
298         DIM = c;
299         if c < 2
300             error('Input data must have at least two columns.');
```

```

301         end
302     case {'MDRQA','MD','MULTI'}
303         DIM = c;
304 end
305
306 % Embed the data
```



```

307  if EMB > 1
308      for i = 1:EMB
309          tempDATA(1:length(DATA) - (EMB-1)*DEL, 1+DIM*(i-1):DIM*i) = DATA(1+(i-
310  1)*DEL:length(DATA) - (EMB-i)*DEL, :);
311      end
312      DATA = tempDATA;
313      clear tempDATA
314  end
315
316  % Calculate distance matrix based on the type of RQA
317  switch upper(TYPE)
318      case 'RQA'
319          a{1}=pdist2(DATA, DATA);
320          a{1}=abs(a{1})*-1;
321      case {'CRQA', 'CROSS'}
322          a{1}=pdist2(DATA(:, 1:DIM:end), DATA(:, 2:DIM:end));
323          a{1}=abs(a{1})*-1;
324      case {'JRQA', 'JOINT'}
325          for i = 1:c
326              a{i}=pdist2(DATA(:, i:DIM:end), DATA(:, i:DIM:end));
327              a{i}=abs(a{i})*-1;
328          end
329      case {'MDRQA', 'MD', 'MULTI'}
330          a{1}=pdist2(DATA, DATA);
331          a{1}=abs(a{1})*-1;
332  end
333
334  % Normalize distance matrix

```

```

335  if contains(NORM, 'euc')
336      for i = 1:length(a)
337          b = mean(a{i}(a{i}<0));
338          b = -sqrt(abs((b^2)+2*(DIM*EMB)));
339          a{i} = a{i}/abs(b);
340      end
341  elseif contains(NORM, 'min')
342      for i = 1:length(a)
343          b = max(a{i}(a{i}<0));
344          a{i} = a{i}/abs(b);
345      end
346  elseif contains(NORM, 'max')
347      for i = 1:length(a)
348          b = min(a{i}(a{i}<0));
349          a{i} = a{i}/abs(b);
350      end
351  elseif contains(NORM, 'non')
352      % do nothing
353  else
354      error('No appropriate norm parameter specified.');
```

355 end

356

357 % Create weighted recurrence plot

358 wrp = a;

359 for i = 1:size(a,2)-1

360 wrp{i+1} = wrp{i}.\*wrp{i+1};

361 end

362 if i

```

363     wrp = -(abs(wrp{i+1}))^(1/(i+1));
364 end
365 if iscell(wrp)
366     wrp = wrp{1};
367 end
368
369 % Calculate recurrence plot
370 switch lower(SETPARA)
371     case {'radius','rad', 1}
372         [perRec, diag_hist, vertical_hist,A] = recurrenceMethod(a,radius);
373     case {'perrec','recurrence', 2}
374         [perRec, diag_hist, vertical_hist, radius, A] =
375 setRadius(radiusStart);
376 end
377
378 %% Calculate RQA variabes
379 RESULTS.DIM = DIM;
380 RESULTS.EMB = EMB;
381 RESULTS.DEL = DEL;
382 RESULTS.RADIUS = radius;
383 RESULTS.NORM = NORM;
384 RESULTS.ZSCORE = ZSCORE;
385 RESULTS.Size=length(A);
386 RESULTS.REC = perRec;
387 if RESULTS.REC > 0
388     RESULTS.DET=100*sum(diag_hist(diag_hist>1))/sum(diag_hist);
389     RESULTS.MeanL=mean(diag_hist(diag_hist>1));
390     RESULTS.MaxL=max(diag_hist);

```

```

391
392 [count,bin]=hist(diag_hist(diag_hist>1),min(diag_hist(diag_hist>1)):max(diag_
393 hist));
394     total=sum(count);
395     p=count./total;
396     del=find(count==0); p(del)=[];
397     RESULTS.EntrL=-sum(p.*log2(p));
398     RESULTS.LAM=100*sum(vertical_hist(vertical_hist>1))/sum(vertical_hist);
399     RESULTS.MeanV=mean(vertical_hist(vertical_hist>1));
400     RESULTS.MaxV=max(vertical_hist);
401
402 [count,bin]=hist(vertical_hist(vertical_hist>1),min(vertical_hist(vertical_hi
403 st>1)):max(vertical_hist));
404     total=sum(count);
405     p=count./total;
406     del=find(count==0); p(del)=[];
407     RESULTS.EntrV=-sum(p.*log2(p));
408     RESULTS.EntrW=RQA_WeightedEntropy( wrp );
409 else
410     RESULTS.DET=NaN;
411     RESULTS.MeanL=NaN;
412     RESULTS.MaxL=NaN;
413     RESULTS.EntrL=NaN;
414     RESULTS.LAM=NaN;
415     RESULTS.MeanV=NaN;
416     RESULTS.MaxV=NaN;
417     RESULTS.EntrV=NaN;
418     RESULTS.EntrW=NaN;
419 end

```

```

420 RP=imrotate(1-A,90);
421
422 %% PLOT
423 scrsz = get(0,'ScreenSize');
424 f = figure('Position',[scrsz(3)/4 scrsz(4)/4 scrsz(3)/3 scrsz(4)/2]);tabgp =
425 uitabgroup(f);
426 binary = uitab(tabgp,'Title','Binary');
427 heatmap = uitab(tabgp,'Title','Heatmap');
428 % Binary Plot (Tab 1)
429 ax(1) = axes('Parent',binary,'Position',[0 0 1 1], 'Visible', 'off');
430 ax(1) = axes('Parent',binary,'Position',[.375 .35 .58 .6], 'FontSize', 8);
431 imagesc(ax(1),RP); colormap(gray);
432 title(['DIM = ', num2str(DIM), '; EMB = ',num2str(EMB), '; DEL = ',
433 num2str(DEL), '; RAD = ', num2str(radius), '; NORM = ',num2str(NORM), ';
434 ZSCORE = ',num2str(ZSCORE)], 'FontSize',8)
435 xlabel('X(i)', 'Interpreter','none', 'FontSize', 10);
436 ylabel('Y(j)', 'Interpreter','none', 'FontSize', 10);
437 set(gca,'XTick',[ ]);
438 set(gca,'YTick',[ ]);
439 switch upper(TYPE)
440     case {'RQA', 'MDRQA', 'MD', 'MULTI'}
441         ax(2) = axes('Parent',binary,'Position',[.375 .1 .58 .15],
442 'FontSize', 8);
443         plot(1:length(DATA(:,1)), DATA(:,1), 'k-');
444         xlim([1 length(DATA(:,1))]);
445         ax(3) = axes('Parent',binary,'Position',[.09 .35 .15 .6], 'FontSize',
446 8);
447         plot(DATA(:,1), 1:length(DATA(:,1)), 'k-');

```

```

448         ylim([1 length(DATA(:,1))]);
449     case {'CRQA','CROSS'}
450         ax(2) = axes('Parent',binary,'Position',[.375 .1 .58 .15],
451 'FontSize', 8);
452         plot(1:length(DATA(:,1)), DATA(:,1), 'k-');
453         xlim([1 length(DATA(:,1))]);
454         ax(3) = axes('Parent',binary,'Position',[.09 .35 .15 .6], 'FontSize',
455 8);
456         plot(DATA(:,2), 1:length(DATA(:,2)), 'k-');
457         ylim([1 length(DATA(:,1))]);
458     case {'JRQA','JOINT'}
459         for i = 1:c
460             ax(2) = axes('Parent',binary,'Position',[.375 .1 .58 .15],
461 'FontSize', 8);
462             plot(1:length(DATA(:,1)), DATA(:,i), 'k-');
463             xlim([1 length(DATA(:,1))]);
464             ax(3) = axes('Parent',binary,'Position',[.09 .35 .15 .6],
465 'FontSize', 8);
466             plot(DATA(:,1), 1:length(DATA(:,i)), 'k-');
467             ylim([1 length(DATA(:,1))]);
468         end
469     end
470     set(gcf, 'CurrentAxes', a1);
471     str(1) = {'%REC = ', sprintf('%.2f',RESULTS.REC)};
472     text(.1, 0.27, str, 'FontSize', 8, 'Color', 'k');
473     str(1) = {'%DET = ', sprintf('%.2f',RESULTS.DET)};
474     text(.1, .24, str, 'FontSize', 8, 'Color', 'k');
475     str(1) = {'%MaxL = ', sprintf('%.0f',RESULTS.MaxL)};
476     text(.1, .21, str, 'FontSize', 8, 'Color', 'k');

```

```

477 str(1) = {'MeanL = ', sprintf('%.2f',RESULTS.MeanL)};
478 text(.1, .18, str, 'FontSize', 8, 'Color', 'k');
479 str(1) = {'EntrL = ', sprintf('%.2f',RESULTS.EntrL)};
480 text(.1, .15, str, 'FontSize', 8, 'Color', 'k');
481 str(1) = {'%LAM = ', sprintf('%.2f',RESULTS.LAM)};
482 text(.1, .12, str, 'FontSize', 8, 'Color', 'k');
483 str(1) = {'MaxV = ', sprintf('%.0f',RESULTS.MaxV)};
484 text(.1, .09, str, 'FontSize', 8, 'Color', 'k');
485 str(1) = {'MeanV = ', sprintf('%.2f',RESULTS.MeanV)};
486 text(.1, .06, str, 'FontSize', 8, 'Color', 'k');
487 str(1) = {'EntrV = ', sprintf('%.2f',RESULTS.EntrV)};
488 text(.1, .03, str, 'FontSize', 8, 'Color', 'k');
489
490 % Heatmap Plot (Tab 2)
491 a2 = axes('Parent',heatmap,'Position', [0 0 1 1], 'Visible', 'off');
492 ax(4) = axes('Parent',heatmap,'Position',[.375 .35 .58 .6], 'FontSize', 8);
493 imagesc(ax(4),imrotate(-1*wrp,90));
494 title(['DIM = ', num2str(DIM), '; EMB = ',num2str(EMB), '; DEL = ',
495 num2str(DEL), '; RAD = ', num2str(radius), '; NORM = ',num2str(NORM), ';
496 ZSCORE = ',num2str(ZSCORE)],'FontSize',8)
497 xlabel('X(i)', 'Interpreter', 'none', 'FontSize', 10);
498 ylabel('Y(j)', 'Interpreter', 'none', 'FontSize', 10);
499 set(gca, 'XTick', [ ]);
500 set(gca, 'YTick', [ ]);
501 switch upper(TYPE)
502     case {'RQA', 'MDRQA', 'MD', 'MULTI'}
503         ax(5) = axes('Parent',heatmap,'Position',[.375 .1 .58 .15],
504 'FontSize', 8);

```

```

505     plot(1:length(DATA(:,1)), DATA(:,1), 'k-');
506     xlim([1 length(DATA(:,1))]);
507     ax(6) = axes('Parent',heatmap,'Position',[.09 .35 .15 .6],
508 'FontSize', 8);
509     plot(DATA(:,1), 1:length(DATA(:,1)), 'k-');
510     ylim([1 length(DATA(:,1))]);
511     case {'CRQA','CROSS'}
512         ax(5) = axes('Parent',heatmap,'Position',[.375 .1 .58 .15],
513 'FontSize', 8);
514         plot(1:length(DATA(:,1)), DATA(:,1), 'k-');
515         xlim([1 length(DATA(:,1))]);
516         ax(6) = axes('Parent',heatmap,'Position',[.09 .35 .15 .6],
517 'FontSize', 8);
518         plot(DATA(:,2), 1:length(DATA(:,2)), 'k-');
519         ylim([1 length(DATA(:,1))]);
520
521     case {'JRQA','JOINT'}
522         for i = 1:c
523             ax(5) = axes('Parent',heatmap,'Position',[.375 .1 .58 .15],
524 'FontSize', 8);
525             plot(1:length(DATA(:,1)), DATA(:,i), 'k-');
526             xlim([1 length(DATA(:,1))]);
527             ax(6) = axes('Parent',heatmap,'Position',[.09 .35 .15 .6],
528 'FontSize', 8);
529             plot(DATA(:,1), 1:length(DATA(:,i)), 'k-');
530             ylim([1 length(DATA(:,1))]);
531         end
532     end

```



```

533 set(gcf, 'CurrentAxes', a2);
534 str(1) = {'EntrW = ', sprintf('%.2f',RESULTS.EntrW)};
535 text(.1, 0.27, str, 'FontSize', 8, 'Color', 'k');
536 linkaxes(ax([1,4]), 'xy');
537 linkaxes(ax([1,2,4,5]), 'x');
538 linkaxes(ax([1,3,4,6]), 'y');
539
540 %% Function for setting radius to achieve a certain recurrence
541     function [perRec, diag_hist, vertical_hist, radiusFinal,A] =
542 setRadius(radius)
543         % Find the radius to provide target % recurrence
544         [perRec, ~, ~, ~] = recurrenceMethod(a,radius);
545         while perRec == 0 || perRec > 2.5
546             % if radius is too small
547             display('Minimum radius has been adjusted...');
548             if perRec == 0
549                 radius = radius*2;
550             elseif perRec > SETVALUE
551                 radius = radius / 1.5;
552             end
553             [perRec, ~, ~, ~] = recurrenceMethod(a,radius);
554         end
555
556         [perRec, ~, ~, ~] = recurrenceMethod(a,radiusEnd);
557         while perRec < SETVALUE
558             % if radiusEnd is too large
559             display('Maximum radius has been increased...');
560             radiusEnd = radiusEnd*2;

```

```

561         [perRec, ~, ~, ~] = recurrenceMethod(a,radiusEnd);
562     end
563
564     % Search for radius with target % recurrence
565     wb = waitbar(0,['Finding radius to give %REC = ',num2str(SETVALUE), '
566 Please wait...']); % create wait bar to display progress
567     lv = radius; % set low value
568     hv = radiusEnd; % set high value
569     target = SETVALUE; % designate what percent recurrence is wanted
570     iter = 20; % Number of iterations to find radius
571     for i1 = 1:iter
572         mid(i1) = (lv(i1)+hv(i1))/2; % find midpoint between hv and lv
573         rad(i1) = mid(i1); % new radius for this iteration
574         %Compute recurrence matrix
575         [perRec, diag_hist, vertical_hist,A] = recurrenceMethod(a,
576 rad(i1));
577
578         perRecIter(i1) = perRec; % set percent recurrence
579
580         if perRecIter(i1) < target
581             % if percent recurrence is below target percent recurrence
582             hv(i1+1) = hv(i1);
583             lv(i1+1) = mid(i1);
584         else
585             % if percent recurrence is above or equal to target percent
586 recurrence
587             lv(i1+1) = lv(i1);
588             hv(i1+1) = mid(i1);

```

```

589         end
590         waitbar(i1/iter,wb); % update wait bar
591     end
592
593     close(wb)
594     perRecFinal = perRecIter(end); % set final percent recurrence
595     radiusFinal = rad(end); % set radius for final percent
596     recurrence
597         disp(['% recurrence = ',num2str(perRecFinal),' , radius =
598 ',num2str((radiusFinal))])
599     end
600
601     function [perRec, diag_hist, vertical_hist, A] = recurrenceMethod(A,
602 radius)
603         if ~iscell(A)
604             A = {A};
605         end
606         for i2 = 1:length(A)
607             A{i2} = A{i2}+radius;
608             A{i2}(A{i2} >= 0) = 1;
609             A{i2}(A{i2} < 0) = 0;
610         end
611
612         if length(A) > 1
613             for i3 = 1:length(A)-1
614                 A{i3+1} = A{i3}.*A{i3+1};
615             end
616             A = A{i3+1};

```

```

617         else
618             A = A{1};
619         end
620
621         diag_hist = [];
622         vertical_hist = [];
623         for i4 = -(length(DATA)-1):length(DATA)-1 % calculate diagonal line
624 distribution
625             C=diag(A,i4);
626             % bwlabel is taking each diagonal line and looking for the 1's,
627 it will
628             % return increasing numbers for each new instance of 1's, for
629 example
630             % the input vector [0 1 1 0 1 0 1 1 0 0 1 1 1] will return
631             %             [0 1 1 0 2 0 3 3 0 0 4 4 4]
632             d=bwlabel(C,8);
633             % tabulate counts the instances of each integer, therefore the
634 line
635             % lengths
636             d=tabulate(d);
637             if d(1,1)==0
638                 d=d(2:end,2);
639             else
640                 d=d(2);
641             end
642             % diag_hist is creating one long array of all of the line lengths
643 for
644             % all of the diagonals

```

```

645         diag_hist(length(diag_hist)+1:length(diag_hist)+length(d))=d;
646     end
647
648     % This removes the line of identity in RQA, jRQA, and mdRQA
649     if ~contains(upper(TYPE),{'CROSS','CRQA'})
650         diag_hist=diag_hist(diag_hist<max(diag_hist));
651         if isempty(diag_hist)
652             diag_hist=0;
653         end
654     end
655
656     for i5=1:length(DATA) % calculate vertical line distribution
657         C=(A(:,i5));
658         v=bwlabel(C,8);
659         v=tabulate(v);
660         if v(1,1)==0
661             v=v(2:end,2);
662         else
663             v=v(2);
664         end
665
666     vertical_hist(length(vertical_hist)+1:length(vertical_hist)+length(v))=v;
667     end
668
669     % Calculate percent recurrence
670     if ~contains(upper(TYPE),{'CROSS','CRQA'})
671         perRec = 100*(sum(sum(A))-length(A))/(length(A)^2-length(A));
672     else

```

```

673         perRec = 100*(sum(sum(A)))/(length(A)^2);
674     end
675 end
676 %% Calculate entropy of weighted recurrence plot
677 function [ Swrp ] = RQA_WeightedEntropy( WRP )
678     N = length(WRP);
679     for j = 1:N
680         si(j) = sum(WRP(:,j));
681     end
682     mi = min(si);
683     ma = max(si);
684     m = (ma - mi)/49;
685     I = 1;
686     S = sum(si);
687     for s = mi:m:ma
688         P = sum( si( si >= s & si < (s+m) ) );
689         p1( I ) = P / S;
690         I = I+1;
691     end
692     for I = 1:length(p1)
693         pp(I) = (p1(I)*log(p1(I)));
694     end
695     pp(isnan(pp)) = 0;
696     Swrp = -1*(sum(pp));
697 end
698 end

```

699 Matlab script used to calculate number of right heel strikes in each breath

700

701 `function [ DRPss,freq ] = drp( B, EI, W, saveFigs, outputFilename )`

702 `% DRP is a function to give frequency and phasic relationships between`

703 `% two time series.`

704 `%`

705 `% Last updated by Will Denton: 2016-04-12`

706 `% Contact information: 21denton@gmail.com`

707 `%`

708 `% [ DRPss,freq ] = drp( B, W, saveFigs, outputFilename ) reads vectors`

709 `% B and W, two time series. DRP figures are output if saveFigs = 'save'`

710 `% using the name input as outputFilename. DRPss outputs t, n, and T`

711 `% values as well as the DRP value calculated from the equation  $t/T*360^\circ$ ,`

712 `% where t is the distance from the peak of the low frequency oscillator to`

713 `% a previous peak of the higher frequency oscillator within the same`

714 `% cycle and T is the distance between the same peak of the higher`

715 `% frequency oscillator and the following peak of the higher frequency`

716 `% oscillator. The output variable freq gives the percentage of`

717 `% frequencies spent at integer and half integer ratios.`

718 `%`

719 `% Two consecutive cycles (of the lower frequency oscillator) must be at`

720 `% the same frequency to be counted as an integer ratio. To be counted as`

721 `% a half integer ratio, the frequency must bounce back and forth between`

722 `% two frequencies for at least three cycles (ex. 2 1 2 ==> 1.5 1.5 1.5).`

723 `% If the frequency is only seen in one consecutive cycle, it is`

724 `% considered as non-coupled and given a value of 0.`

725

726 `[~,HS] = findpeaks(W);`

```

727
728 %%
729 F1 = figure('units','normalized','outerposition',[0 0 1 1]);
730 tgroup = uitabgroup('Parent', F1);
731 tab1 = uitab('Parent', tgroup, 'Title', 'DRP');
732 tab2 = uitab('Parent', tgroup, 'Title', 'Return Map');
733 tab3 = uitab('Parent', tgroup, 'Title', 'Rose Plot');
734
735 %% Tab 1
736 a1 = axes('parent', tab1);
737 subplot(3,2,1); plot(B,'k'); hold on;
738 for i = 1:length(HS)
739     plot([HS(i),HS(i)],[min(B),max(B)],'k');
740 end
741 set(gca,'XLim',[0 length(B)]);
742 set(gca,'YLim',[mean(B)-0.5*std(B) max(B)]);
743 scatter(EI,B(EI),'k','filled');
744
745 %% DRP calculation:
746 %% Compute tiR(p)
747 clc; i = 2; back = 0;
748 for i1 = 1:length(HS)
749     if HS(i1) < EI(1)
750         display('Discrete point discarded ...');
751         back = back+1;
752     elseif HS(i1) < EI(i)
753         tiRp(i1-back) = EI(i) - HS(i1);
754     else

```



```

755         if i < length(EI)
756             i = i+1;
757             tiRp(i1-back) = EI(i) - HS(i1);
758         end
759     end
760 end
761 HS = HS(back+1:end);
762 HS = HS(HS <= EI(end));
763
764 %% Compute Ti
765 Ti = diff(HS);
766
767 %% Find n's
768 for i = 1:length(EI) - 1
769     holder = 0;
770     for f = 1:length(HS)-1
771         if HS(f) >= EI(i) && HS(f) < EI(i+1)
772             holder = holder + 1;
773         end
774     end
775     n(i,1) = holder-1;
776 end
777
778 %% Discrete relative phase
779 i = 1;
780 DRPss(1,:) = {'t','n','T','DRP'};
781 for i1 = 1:length(Ti)
782     DRP(i1,1) = tiRp(i1)/Ti(i1)*360;

```

```

783         DRPss{i+1,1} = tiRp(i1);
784         DRPss{i+1,3} = Ti(i1);
785         DRPss{i+1,4} = DRP(i);
786         i = i+1;
787     end
788
789     i = 1;
790     for k = 1:length(n)
791         for i1 = 0:n(k)
792             DRPss{i+1,2} = n(k) - i1;
793             i = i+1;
794         end
795     end
796
797     subplot(3,2,3:4); plot(DRP, 'k-o'); hold on;
798     maxDRP = round(max(DRP)/360)+1;
799     for i = 1:maxDRP
800         plot([0,length(DRP)], [360*(i-1),360*(i-1)], 'k');
801         for i1 = 1:length(DRP)
802             if DRP(i1) > 360*(i-1) && DRP(i1) <= 360*i
803                 count(i1,1) = i;
804             else
805                 end
806             end
807         end
808     set(gca, 'XLim', [1 length(DRP)]); set(gca, 'YTick', 0:360:360*DRP);
809     set(gca, 'YLim', [0 360*maxDRP]);
810

```

```

811     %% Find half integers
812     DRPfirst(1,1) = DRPss{2,4};
813     i1 = 2;
814     for i = 3:length(DRPss)-1
815         if DRPss{i,2} == 0
816             DRPfirst(i1,1) = DRPss{i+1,4};
817             DRProse(i1,1) = DRPss{i,4};
818             i1 = i1+1;
819         else
820             end
821     end
822
823     %% Get percentage of coupling frequencies
824     for i = 1:length(DRPfirst)
825         for i1 = 1:maxDRP
826             if DRPfirst(i) > (i1-1) * 360 && DRPfirst(i) <= i1*360
827                 freqFromDRP(i) = i1;
828             else
829                 end
830         end
831     end
832
833     if freqFromDRP(1) == freqFromDRP(3) && freqFromDRP(2) == freqFromDRP(4)
834 && abs( freqFromDRP(1)-freqFromDRP(2) ) == 1
835         DRPfirstHalfInt(1) = ( freqFromDRP(1) + freqFromDRP(2) ) / 2;
836     else
837         DRPfirstHalfInt(1) = freqFromDRP(1);
838     end

```

```

839
840     last=length(freqFromDRP); counter = 0;
841     for i = 2:last-1
842         if freqFromDRP(i-1) == freqFromDRP(i+1) && abs(freqFromDRP(i)-
843 freqFromDRP(i+1)) == 1
844             DRPfirstHalfInt(i) = ( freqFromDRP(i)+freqFromDRP(i+1) ) / 2;
845             counter = counter+1;
846         else
847             if mod(counter,2) == 1 && counter<i && counter > 1
848                 DRPfirstHalfInt(i-counter-1) = DRPfirstHalfInt(i-counter);
849             else
850                 end
851                 DRPfirstHalfInt(i) = freqFromDRP(i);
852                 counter = 0;
853             end
854         end
855     DRPfirstHalfInt(last) = freqFromDRP(last);
856
857     %First
858     if DRPfirstHalfInt(1) == DRPfirstHalfInt(2)
859         DRPwithNC(1) = DRPfirstHalfInt(1);
860     else
861         DRPwithNC(1) = 0; %NC
862     end
863     %Middle
864     for i = 2:length(DRPfirstHalfInt)-1;
865         if DRPfirstHalfInt(i) == DRPfirstHalfInt(i+1) || DRPfirstHalfInt(i)
866 == DRPfirstHalfInt(i-1)

```

```

867         DRPwithNC(i) = DRPfirstHalfInt(i);
868     else
869         DRPwithNC(i) = 0; %NC
870     end
871 end
872 %End
873 last = length(DRPfirstHalfInt);
874 if DRPfirstHalfInt(last) == DRPfirstHalfInt(last-1)
875     DRPwithNC(last) = DRPfirstHalfInt(last);
876 else
877     DRPwithNC(last) = 0; %NC
878 end
879
880 subplot(3,2,5:6); plot(DRPfirst,'k-o'); hold on;
881 maxDRP = round(max(DRPfirst)/360)+1;
882 for i = 1:maxDRP
883     plot([0,length(DRPfirst)],[360*i,360*i],'k');
884     for i1 = 1:length(DRPfirst)
885         if DRPfirst(i1) > 360*(i-1) && DRPfirst(i1) <= 360*i
886             count(i1,1) = i;
887             text(i1,DRPfirst(i1),['
888 ',num2str(DRPwithNC(i1))],'VerticalAlignment','bottom');
889         else
890             end
891     end
892 end
893 set(gca,'XLim',[1 length(DRPfirst)]); set(gca,'YTick',0:360:360*maxDRP);
894 set(gca,'YLim',[0 360*maxDRP]);

```

```

895
896 %%
897 maxn = max(DRPwithNC);
898 freq(1,:) = {'Ratio', 'Occurances', 'PercentageofTotal'};
899 freq{2,1} = 0; %NC
900 freq{2,2} = length(DRPwithNC(DRPwithNC==0));
901 freq{2,3} = freq{2,2}/length(DRPwithNC)*100;
902 for i = [1:0.5:maxn]
903     freq{i*2+1,1} = i;
904     freq{i*2+1,2} = length(DRPwithNC(DRPwithNC==i));
905     freq{i*2+1,3} = freq{i*2+1,2}/length(DRPwithNC)*100;
906 end
907
908 %%
909 [B,~] = size(freq);
910 subplot(3,2,2);
911 for i = 2:B
912     bar(freq{i,1},freq{i,3},0.5,'k'); hold on;
913     if freq{i,3} > 0
914         text(freq{i,1}-0.025*B,-
915 1,sprintf('%2.2f%%', (freq{i,3})), 'VerticalAlignment', 'bottom', 'Color', 'w', 'Fo
916 ntSize',12, 'FontWeight', 'bold');
917     end
918 end
919 holder = freq{i,1}+0.5;
920
921 set(gca, 'XLim', [-0.5 maxn+1]);
922 set(gca, 'XTick', [(0:0.5:maxn+0.5)]);

```

```

923     set(gca, 'XTickLabel', {'NC', (0.5:0.5:maxn), 'PC'});
924     set(gca, 'YTick', [0:10:100]);
925     set(gca, 'YLim', [0 100]);
926
927     %%
928     [a,~] = size(freq);
929     for i = 2:a
930         c(i) = freq{i,3};
931     end
932     [MCFRpercent,MCFRindex] = max(c(2:length(c)));
933     MCFR = freq{MCFRindex+1,1};
934
935     %% Check which frequencies are present;
936     clear f;
937     for i = 3:length(freq)
938         if freq{i,3} ~= 0 && freq{i,3} <= 100
939             if mod(freq{i,1},1) ~= 0
940                 mult = 2;
941             else
942                 mult = 1;
943             end
944             if exist('f')
945                 f = [f,freq{i,1}*mult];
946             else
947                 f = freq{i,1}*mult;
948             end
949         end
950     end

```





```

979         end
980         PC = sum(wdn) / length(wdn) * 100;
981         LagPC(k, :) = [lag, PC];
982         n = n+1;
983     end
984 end
985
986     [~, lag4maxPC] = max(LagPC(:, 2));
987     index = LagPC(lag4maxPC, 1);
988     [r, ~] = size(freq);
989     freq{r+1, 1} = '----';
990     freq{r+1, 2} = '----';
991     freq{r+1, 3} = '----';
992     freq{r+2, 1} = 'PC';
993     freq{r+2, 2} = index;
994     freq{r+2, 3} = max(LagPC(:, 2));
995     subplot(3, 2, 2); hold on; bar(holder, LagPC(lag4maxPC, 2), 0.5, 'k');
996     text(holder-0.025*B, -
997 1, sprintf('%2.2f%%', LagPC(lag4maxPC, 2)), 'VerticalAlignment', 'bottom', 'Color',
998 'w', 'FontSize', 12, 'FontWeight', 'bold');
999     original = DRP(1:length(DRP)-index);
1000     lagged = DRP(1+index:length(DRP));
1001
1002     %% Tab 2
1003     a2 = axes('parent', tab2);
1004     scatter(original, lagged, 'k'); hold on;
1005     plot([0 max(DRP)], [0 max(DRP)], 'k'); plot([0+40 max(DRP)+40], [0
1006 max(DRP)], 'r--'); plot([0-40 max(DRP)-40], [0 max(DRP)], 'r--');

```

```

1007     title(['Lag = ', num2str(index)]); set(gca, 'XLim', [0, max(DRP)]);
1008 set(gca, 'YLim', [0, max(DRP)]); set(gca, 'XTick', 0:360:max(DRP));
1009 set(gca, 'YTick', 0:360:max(DRP)); grid on;
1010     for i = 1:round(MCFR)
1011         annotation(tab2, 'textbox', [0.1025+(0.775)/(max(DRP))*(180+360*(i-1))
1012 , 0.075 , 0.0325 ,
1013 0.02], 'String', num2str(LagPC(i,2)), 'FontSize', 20, 'EdgeColor', 'none');
1014     end
1015
1016     %% Tab 3
1017     a3 = axes('parent', tab3); rose(DRProse/180*pi, 20);
1018     [r,c] = size(freq);
1019     fprintf('\r');
1020     for i = 1:r
1021         for i1 = 1:c
1022             if i == 1
1023                 %Do nothing
1024             elseif i == r-1
1025                 fprintf('%s\t\t', freq{i, i1});
1026             elseif i == r
1027
1028             else
1029                 fprintf('%2.1f\t\t', freq{i, i1});
1030             end
1031         end
1032     if i == 1
1033         fprintf('%s\t\t%s\t%s', freq{i, :});
1034     elseif i == r

```

```
1035         fprintf('%s\t\t%2.2f\t\t%2.2f',freq{i,:});
1036     end
1037     fprintf('\r');
1038 end
1039 fprintf('\r');
1040
1041 filename = outputFilename;
1042 if iscell(filename)
1043     filename = filename{1};
1044 end
1045
1046 if saveFigs == 1
1047     savefig(F1,[filename '_DRP.fig']);
1048     savefig(f2,[newSub_dir filename '_' ] 'returnMap.fig')
1049     save([filename '_DRP.mat'],'DRPss')
1050     save([filename '_freq.mat'],'freq')
1051 else
1052     display('Figures not saved ...');
1053 end
1054
1055 match = 0;
1056 if exist('DRPresults.mat') ~= 0
1057     load('DRPresults.mat');
1058     [~,l] = size(DRPresults);
1059     for i = 1:l
1060         if strfind(DRPresults(i).name, filename) == 1
1061             l = i;
1062             match = 1;
```

```
1063         else
1064             if i == 1 && match == 0
1065                 l = l+1;
1066             end
1067         end
1068     end
1069 else
1070     l = 1;
1071 end
1072 DRPresults(l).name = filename;
1073 DRPresults(l).MCFR = MCFR;
1074 DRPresults(l).MCFRpercent = MCFRpercent;
1075 DRPresults(l).PC = LagPC(:,2);
1076 DRPresults(l).PClag = LagPC(lag4maxPC,1);
1077 DRPresults(l).freq = freq;
1078 save('DRPresults','DRPresults');
1079 end
1080
```
